# Diabetes Care

January 2014 Volume 37, Supplement 1

THE JOURNAL OF CLINICAL AND APPLIED RESEARCH AND EDUCATION

[T]he simple word *Care* may suffice to express [the journal's] philosophical mission. The new journal is designed to promote better patient care by serving the expanded needs of all health professionals committed to the care of patients with diabetes. As such, the American Diabetes Association views *Diabetes Care* as a reaffirmation of Francis Weld Peabody's contention that "the secret of the care of the patient is in caring for the patient."

—Norbert Freinkel, *Diabetes Care*, January-February 1978

## EDITOR IN CHIEF

William T. Cefalu, MD

---

## ASSOCIATE EDITORS

George Bakris, MD  
Lawrence Blonde, MD, FACP  
Andrew J.M. Boulton, MD  
Mary de Groot, PhD  
Eddie L. Greene, MD  
Robert Henry, MD  
Sherita Hill Golden, MD, MHS, FAHA  
Frank Hu, MD, MPH, PhD  
Derek LeRoith, MD, PhD  
Robert G. Moses, MD  
Stephen Rich, PhD  
Matthew C. Riddle, MD  
Julio Rosenstock, MD  
William V. Tamborlane, MD  
Katie Weinger, EdD, RN  
Judith Wylie-Rosett, EdD, RD

## EDITORIAL BOARD

Silva A. Arslanian, MD  
Angelo Avogaro, MD, PhD  
Mary Ann Banerji, MD  
Ananda Basu, MD, FRCP  
Patricia El Beitune, MD, PhD  
Mark R. Burge, MD  
John B. Buse, MD, PhD  
Sonia Caprio, MD  
N. Wah Cheung, MBBS, FRACP, PhD  
Robert Chilton, DO  
Kenneth Cusi, MD, FACP, FACE  
Stefano Del Prato, MD  
Dariush Elahi, PhD  
Massimo Federici, MD  
Robert G. Frykberg, DPM, MPH  
W. Timothy Garvey, MD  
Ronald B. Goldberg, MD  
Linda Gonder-Frederick, PhD  
Margaret Grey, DrPH, RN, FAAN  
Rita R. Kalyani, MD, MHS  
Dianna J. Magliano, MPH, PhD  
Theodore Mazzone, MD  
Rory J. McCrimmon, MD, MRCP, MB, ChB  
Louis Monnier, MD  
Antoinette Moran, MD  
Sunder Mudaliar, MD  
Gianluca Perseghin, MD  
Anne L. Peters, MD  
Pedro Romero-Aroca, PhD  
Elizabeth R. Seaquist, MD  
Jeff Unger, MD  
Ram Weiss, MD, PhD  
Deborah J. Wexler, MD, MSc

---

## AMERICAN DIABETES ASSOCIATION OFFICERS

|                                                                           |                                                                          |
|---------------------------------------------------------------------------|--------------------------------------------------------------------------|
| CHAIR OF THE BOARD<br>Dwight Holing                                       | SECRETARY/TREASURER-ELECT<br>Richard Farber, MBA                         |
| PRESIDENT, MEDICINE & SCIENCE<br>Elizabeth R. Seaquist, MD                | VICE CHAIR OF THE BOARD<br>Robin J. Richardson                           |
| PRESIDENT, HEALTH CARE & EDUCATION<br>Marjorie Cypress, PhD, RN, CNP, CDE | VICE PRESIDENT, MEDICINE & SCIENCE<br>Desmond Schatz, MD                 |
| SECRETARY/TREASURER<br>Robert J. Singley, MBA                             | VICE PRESIDENT, HEALTH CARE & EDUCATION<br>Margaret Powers, PhD, RD, CDE |
| CHAIR OF THE BOARD-ELECT<br>Janel L. Wright, JD                           | VICE SECRETARY/TREASURER<br>Lorrie Welker Liang                          |
| PRESIDENT-ELECT, MEDICINE & SCIENCE<br>Samuel Dagogo-Jack, MD, FRCP       | CHIEF EXECUTIVE OFFICER<br>Larry Hausner, MBA                            |
| PRESIDENT-ELECT, HEALTH CARE & EDUCATION<br>David G. Marrero, PhD         | CHIEF SCIENTIFIC & MEDICAL OFFICER<br>Robert E. Ratner, MD, FACP, FACE   |

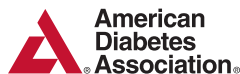

The mission of the American Diabetes Association  
is to prevent and cure diabetes and to improve  
the lives of all people affected by diabetes.

# Diabetes Care

January 2014 Volume 37, Supplement 1

THE JOURNAL OF CLINICAL AND APPLIED RESEARCH AND EDUCATION

*Diabetes Care* is a journal for the health care practitioner that is intended to increase knowledge, stimulate research, and promote better management of people with diabetes. To achieve these goals, the journal publishes original research on human studies in the following categories: Clinical Care/Education/Nutrition/Psychosocial Research, Epidemiology/Health Services Research, Emerging Technologies and Therapeutics, Pathophysiology/Complications, and Cardiovascular and Metabolic Risk. The journal also publishes ADA statements, consensus reports, clinically relevant review articles, letters to the editor, and health/medical news or points of view. Topics covered are of interest to clinically oriented physicians, researchers, epidemiologists, psychologists, diabetes educators, and other health professionals. More information about the journal can be found online at [care.diabetesjournals.org](http://care.diabetesjournals.org).

*Diabetes Care* (print ISSN 0149-5992, online ISSN 1935-5548) is owned, controlled, and published monthly by the American Diabetes Association, Inc., 1701 North Beauregard St., Alexandria, VA 22311. *Diabetes Care* is a registered trademark of the American Diabetes Association.

Copyright © 2014 by the American Diabetes Association, Inc. All rights reserved. Printed in the USA. Requests for permission to reuse content should be sent to Copyright Clearance Center at [www.copyright.com](http://www.copyright.com) or 222 Rosewood Dr., Danvers, MA 01923; phone: (978) 750-8400; fax: (978) 646-8600. Requests for permission to translate should be sent to Permissions Editor, American Diabetes Association, at [permissions@diabetes.org](mailto:permissions@diabetes.org).

The American Diabetes Association reserves the right to reject any advertisement for any reason, which need not be disclosed to the party submitting the advertisement.

Commercial reprint orders should be directed to Sheridan Content Services, (800) 635-7181, ext. 8065.

Single issues of *Diabetes Care* can be ordered by calling toll-free (800) 232-3472, 8:30 A.M. to 5:00 P.M. EST, Monday through Friday. Outside the United States, call (703) 549-1500. Rates: \$75 in the United States, \$95 in Canada and Mexico, and \$125 for all other countries.

*Diabetes Care* is available online at [care.diabetesjournals.org](http://care.diabetesjournals.org). Please call the numbers listed above, e-mail [membership@diabetes.org](mailto:membership@diabetes.org), or visit the online journal for more information about submitting manuscripts, publication charges, ordering reprints, subscribing to the journal, becoming an ADA member, advertising, permission to reuse content, and the journal's publication policies.

Periodicals postage paid at Alexandria, VA, and additional mailing offices.

POSTMASTER: Send address changes to *Diabetes Care*, American Diabetes Association, Inc., Journal Subscriptions, 1701 North Beauregard St., Alexandria, VA 22311. Claims for missing issues should be made within 6 months of publication. The publisher expects to supply missing issues free of charge only when losses have been sustained in transit and when the reserve stock permits.

PRINT ISSN 0149-5992  
ONLINE ISSN 1935-5548  
PRINTED IN THE USA

---

## AMERICAN DIABETES ASSOCIATION PERSONNEL AND CONTACTS

### EDITORIAL OFFICE DIRECTOR

Lyn Reynolds

### PEER REVIEW MANAGER

Shannon Potts

### EDITORIAL ASSISTANT

Rita Summers

### EDITORIAL OFFICE SECRETARIES

Raquel Castillo

Joan Garrett

### MANAGING DIRECTOR, SCHOLARLY

JOURNAL PUBLISHING

Christian S. Kohler

### DIRECTOR, SCHOLARLY JOURNAL PUBLISHING

Heather L. Norton

### EDITORIAL MANAGERS

Valentina Such

Nancy C. Baldino

### PRODUCTION MANAGER

Amy S. Gavin

### TECHNICAL EDITOR

Oedipa Rice

### VICE PRESIDENT, MEMBERSHIP &

DIRECT RESPONSE MARKETING

Richard Erb

### VICE PRESIDENT, CORPORATE ALLIANCES

Nancy Stinson Harris

### ADVERTISING MANAGER

Julie DeVoss Graff

[jdevoss@diabetes.org](mailto:jdevoss@diabetes.org)

(703) 299-5511

### MANAGER, MEMBERSHIP/SUBSCRIPTION SERVICES

Donald Crowl

### ASSOCIATE DIRECTOR, FULFILLMENT

Caryn Cochran

### ADVERTISING REPRESENTATIVES

TMG Custom Media

Nancy Greenwald

[ngreenwald@adamediasales.com](mailto:ngreenwald@adamediasales.com)

(646) 783-3786

The Jackson-Gaeta Group, Inc.

B. Joseph Jackson

[bartjack@aol.com](mailto:bartjack@aol.com)

Paul Nalbandian

[pnalbandian4ada@aol.com](mailto:pnalbandian4ada@aol.com)

(973) 403-7677
